# Supplementary material for: Geospatial modelling of large-wood supply to rivers: a state-of-the-art model comparison in Swiss mountain river catchments
Source: Copernicus journal article supplement (doi:10.5194/esurf-11-487-2023), 2023-06-20
Supplement: Supplementary file 1 [file esurf-11-487-2023-supplement.pdf]

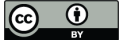

*Supplement of*

## **Geospatial modelling of large-wood supply to rivers: a state-of-the-art model comparison in Swiss mountain river catchments**

**Nicolas Steeb et al.**

*Correspondence to:* Nicolas Steeb ([nicolas.steeb@wsl.ch](mailto:nicolas.steeb@wsl.ch))

The copyright of individual parts of the supplement might differ from the article licence.

# Supplementary material

## Supplementary Text

The following geodata were used to determine the landslide and debris flow trajectories:

- A grid-based terrain model (DTM) of the whole of Switzerland with 10-meter resolution (Schneider, 1998). The DTM was used to calculate slope inclination, exposure, Topo-Index (Quinn et al., 1995), stream network, gullies, and catchment area.
- The Hydrological Atlas of Switzerland (HADES Sheet 2.4; Geiger et al., 1992) provided a digital map for extreme point rainfall intensities (24 hours duration for a 100-year return period), categorized in three intensity classes (< 150 mm, 150-200 mm, > 200 mm). These values were used as a rough approximation of the critical water content in a given soil (pore water pressure/cohesion).
- Based on the digital geotechnical map of Switzerland (1:200'000), lithological units were classified and attributed with respect to their weatherability and stability (soil resistance against failure) and used for landslide and debris flow modelling.

The simulation of debris flow processes in SilvaProtect-CH was carried out with the model package MGSIM (Zimmermann et al., 1997). Critical slope for debris flow initiation was defined as a function of catchment area according to Zimmermann et al. (1997); the smaller the catchment area above a channel section, the steeper the channel section must be in order for debris flows to occur. The run-out distance of debris flows was estimated using a 2-parameter mass point model based on the Voellmy avalanche model (Gamma, 2000; Perla et al., 1980; Rickenmann, 2005). For given channel reach slopes and friction parameters, the model calculates the velocity of a debris flow along the flow path, until the velocity decreases to zero. Using a Monte-Carlo and random walk approach reproduces trajectories that include the spreading effect of debris flows on fans (Gamma, 2000; Wichmann and Becht, 2003).

Overall, approx. 6.7 million trajectories were calculated over the entire area of Switzerland, representing the possible process space of debris flows. Each trajectory stands for a debris flow from the starting point to the outermost deposition point. Only debris flows in the channel were modelled. Unconfined debris flows on the slope (for example in alpine scree dumps) were categorized as landslide trajectories.

Landslide trajectories in SilvaProtect-CH consider shallow landslides (soil slips/spontaneous landslides) and hillslope debris flows. The landslide scars (starting zones) were modelled using the infinite slope model, where the slope stability is calculated for each grid cell. The infinite slope model is used to calculate a factor of safety (FS), based on limit equilibrium analysis that determines the balance between shear stress, which induces fracture along the supposed failure plane, and shear strength, which serves to resist shear fracture (Lee and Park, 2016; Selby, 1993). The decisive parameters are the slope inclination, which is calculated from the digital elevation model, the subsurface water level, and shear parameters (cohesion and friction angle) derived from the geotechnical map of Switzerland (Liener and Kienholz, 1998; Tobler et al., 2013a, 2013b).

Based on the modelled landslide scars, the possible flow path trajectories of shallow landslides were simulated. In order to keep the number of trajectories as low as possible, the raster cells of each landslide scar were thinned out before modelling the run-out distances. Based on the parameter set defined in test areas, the calculation of landslide scars and flow path trajectories was carried out automatically over the entire area of Switzerland. Due to the large landslide scars area, approx. 47.6 million landslide trajectories were calculated.

## References

- Gamma, P.: dfwalk – Ein Murgangsimulationprogramm zur Gefahrenzonierung. *Geographica Bernensia*, G66, Geographisches Institut der Universität Bern, 144 p. (in German), 2000.
- Geiger, H., Röthlisberger, G., Stehli, A., Zeller, J.: Extreme Punktregen unterschiedlicher Dauer und Wiederkehrperioden 1901-1970, *Hydrologischer Atlas der Schweiz*, 1992.
- Lee, J.H. and Park, H.J.: Assessment of shallow landslide susceptibility using the transient infiltration flow model and GIS-based probabilistic approach. *Landslides*, 13, 885–903, <https://doi.org/10.1007/s10346-015-0646-6>, 2016.
- Liener, S. and Kienholz, H.: Predicting the spatial distribution of shallow landslides - the improved model SLIDISP, in: *Proceedings of the International Association for Mathematical Geology IAMG'98*, edited by: Buccianti, A., Nardi, G., and Potenza, R., Isola d'Ischia, Naples, Italy, 229–234, 1998.
- Perla, R., Cheng, T.T., and McClung, D.M.: A two-parameter model of snow-avalanche motion. *Journal of Glaciology*, 26, 197–207, <https://doi.org/10.3189/S002214300001073X>, 1980.
- Quinn, P.F., Beven, K.J., and Lamb, R.: The  $\ln(a/\tan\beta)$  index: How to calculate it and how to use it within the topmodel framework, *Hydrological Processes*, 9, 161–182, <https://doi.org/10.1002/hyp.3360090204>, 1995.
- Rickenmann, D.: Runout prediction methods, in: *Debris-Flow Hazards and Related Phenomena*, edited by: Jakob, M. and Hungr, O., Praxis-Springer, Heidelberg, Germany, 263–282, 2005.
- Schneider, B.: Geomorphologisch plausible Rekonstruktion der digitalen Repräsentation von Geländeoberflächen aus Höhenliniendaten, Ph.D. thesis, Department of Geography, University of Zürich Zürich, Switzerland, 1998.
- Tobler, D., Riner, R., and Pfeifer, R.: Runout modelling of shallow landslides over large areas with SliDepot, in: *Landslide Science and Practice*, edited by: Margottini, C., Canuti, P., and Sassa, K., Springer, Berlin, Heidelberg, Germany, 239–245, [https://doi.org/10.1007/978-3-642-31310-3\\_32](https://doi.org/10.1007/978-3-642-31310-3_32), 2013a.
- Tobler, D., Riner, R., and Pfeifer, R.: Modeling potential shallow landslides over large areas with SliDisp+, in: *Landslide Science and Practice*, edited by: Margottini, C., Canuti, P., and Sassa, K., Springer, Berlin, Heidelberg, Germany, 37–45, [https://doi.org/10.1007/978-3-642-31310-3\\_6](https://doi.org/10.1007/978-3-642-31310-3_6), 2013b.
- Wichmann, V. and Becht, M.: Modelling of geomorphological processes in an alpine catchment, in: *7th International Conference on GeoComputation*, Southampton, UK, 8–10 September, 2003.
- Zimmermann, M., Mani, P., and Gamma, P.: Murganggefahr und Klimaänderung – ein GIS-basierter Ansatz, vdf Hochschulverlag, Zürich, Switzerland, 162 pp. (in German), 1997.

## Supplementary Tables

**Table S1: Characteristics of the 40 test catchments. Dominant recruitment process categories are: B = Bank erosion, D = Debris flow, I = Instream wood mobilization, L = Landslide**

| Stream/River          | Date       | Canton    | LW volume [solid m <sup>3</sup> ] | Observation category | Dominant recruitment process | Catchment area [km <sup>2</sup> ] | Stream length [km] | Forested stream length [km] | Forest area [km <sup>2</sup> ] | Deciduous trees [%] | Peak discharge [m <sup>3</sup> /s] | Return period [a] | Runoff volume [m <sup>3</sup> ] | Sediment load [m <sup>3</sup> ] | Melton ratio [-] | Precipitation duration [h] | Precipitation average [mm] |
|-----------------------|------------|-----------|-----------------------------------|----------------------|------------------------------|-----------------------------------|--------------------|-----------------------------|--------------------------------|---------------------|------------------------------------|-------------------|---------------------------------|---------------------------------|------------------|----------------------------|----------------------------|
| Chirel                | 22.08.2005 | Berne     | 11350                             | Recruitment          | D, B                         | 128.7                             | 134.8              | 72.1                        | 30.1                           | 24.2                | 100                                |                   | 5'414'123                       | 90'000                          | 0.17             |                            | 101                        |
| Grosse Melchaa        | 22.08.2005 | Obwalden  | 5530                              | Recruitment          | L, B, D                      | 72.6                              | 110.6              | 61.3                        | 16.1                           | 47.6                |                                    |                   | 9'362'585                       | 125'000                         | 0.26             |                            | 226                        |
| Kleine Emme           | 22.08.2005 | Lucerne   | 5350                              | Recruitment          | B                            | 478.4                             | 1518.2             | 1149.8                      | 180.1                          | 31.4                |                                    |                   |                                 |                                 | 0.09             |                            |                            |
| Landquart             | 22.08.2005 | Grisons   | 4140                              | Recruitment          | B, (L)                       | 119.0                             | 148.1              | 11.2                        | 6.1                            | 14.4                | 150                                |                   | 6'725'221                       | 200'000                         | 0.19             | 72                         | 150                        |
| Chiene                | 22.08.2005 | Berne     | 3150                              | Recruitment          | D, B, L                      | 90.5                              | 116.0              | 50.8                        | 16.2                           | 24.1                | 90                                 | 50-100            | 6'135'402                       | 90'000                          | 0.31             |                            | 162                        |
| Holdenbach            | 18.09.2006 | Uri       | 3000                              | Deposition           | B, I, (M)                    | 5.4                               | 11.6               | 6.8                         | 1.2                            | 28.4                |                                    |                   |                                 | 12'000                          | 0.71             |                            |                            |
| Ava da Tuors          | 08.08.2009 | Grisons   | 2310                              | Deposition           | D                            | 56.8                              | 85.7               | 20.0                        | 5.0                            | 7.3                 |                                    |                   |                                 |                                 | 0.28             | 2                          | 29                         |
| Horboden              | 22.08.2005 | Berne     | 2261                              | Recruitment          | D, B, (I)                    | 28.6                              | 28.966             | 16.5                        | 5.7                            | 29.6                |                                    |                   |                                 |                                 | 0.34             |                            |                            |
| Schächen              | 22.08.2005 | Uri       | 2000                              | Deposition           | D, L, B, I                   | 108.0                             | 129.3              | 60.9                        | 18.1                           | 32.6                | 120                                |                   | 6'992'233                       | 200'000                         | 0.27             | 48                         | 245                        |
| Chratzmattigrabe      | 22.08.2005 | Berne     | 2000                              | Recruitment          | D                            | 3.1                               | 3.9                | 3.1                         | 0.6                            | 28.7                |                                    |                   | 131'782                         | 30'000                          | 0.91             |                            | 135                        |
| Engelberger Aa        | 22.08.2005 | Nidwalden | 1875                              | Deposition           |                              | 229.0                             | 296.0              | 142.0                       | 48.3                           | 46.4                | 230                                | 200               | 28'997'813                      | 210'000                         | 0.18             | 48                         | 186                        |
| Ticino - Airolo       | 25.08.1987 | Ticino    | 1824                              | Deposition           | B                            | 156.0                             | 18.8               | 6.5                         | 19.0                           | 15.3                | 210                                |                   | 8'000'000                       |                                 | 0.09             |                            |                            |
| Fildrich              | 22.08.2005 | Berne     | 1689                              | Recruitment          | B                            | 19.8                              | 14.594             | 6.5                         | 3.5                            | 30.2                |                                    |                   |                                 |                                 | 0.33             |                            |                            |
| Engstlige             | 10.10.2011 | Berne     | 1200                              | Deposition           | B, I                         | 145.0                             | 246.9              | 116.9                       | 23.6                           | 25.9                | 115                                |                   | 3'246'811                       | 20'000                          | 0.21             | 16                         | 68                         |
| Zulg                  | 04.07.2012 | Berne     | 1000                              | Deposition           | B, L, I                      | 88.2                              | 298.0              | 247.7                       | 35.0                           | 25.1                | 210                                | 100               |                                 | 15'000                          | 0.16             | 2.5                        | 60                         |
| Steinibach (Dorfbach) | 15.08.1997 | Obwalden  | 900                               | Deposition           | I, D                         | 3.3                               | 4.2                | 3.0                         | 1.7                            | 37.4                | 40                                 | 100               |                                 | 26'000                          | 0.85             | 2.5                        | 140                        |
| Goldbach              | 22.08.2005 | Berne     | 888                               | Recruitment          | B, I                         | 3.8                               | 3.862              | 2.8                         | 0.7                            | 24.7                |                                    |                   |                                 |                                 | 0.85             |                            |                            |
| Chratzmattigrabe      | 23.08.2005 | Berne     | 748                               | Deposition           | D                            | 3.1                               | 3.9                | 3.1                         | 0.6                            | 28.7                |                                    |                   | 131'782                         | 30'000                          | 0.91             |                            | 135                        |
| Buembachgrabe         | 24.07.2014 | Berne     | 717                               | Recruitment          | B, L                         | 4.9                               | 4.6                | 3.9                         | 1.4                            | 16.4                | 59                                 |                   |                                 |                                 | 0.51             |                            | 97                         |
| Ganterbach / Saltina  | 24.09.1993 | Valais    | 705                               | Recruitment          | B, L                         | 66.5                              | 101.9              | 32.9                        | 16.0                           | 8.8                 | 85                                 | 50                | 1'350'000                       | 250'000                         | 0.33             |                            |                            |
| Schöniseibach         | 24.07.2014 | Berne     | 641                               | Recruitment          | B, L                         | 4.5                               | 1.5                | 1.3                         | 0.7                            | 13.8                | 55                                 |                   |                                 |                                 | 0.55             |                            | 81                         |
| Lauí                  | 31.05.2017 | Obwalden  | 600                               | Deposition           | B, L, I                      | 44.8                              | 149.8              | 121.3                       | 25.0                           | 34.2                | 90                                 | 30-50             |                                 | 10000                           | 0.24             | 1                          | 100                        |
| Chlosegrabe           | 22.08.2005 | Berne     | 542                               | Recruitment          | D                            | 3.1                               | 4.185              | 3.1                         | 0.5                            | 23.6                |                                    |                   |                                 |                                 | 0.83             |                            |                            |
| Secklisbach           | 01.08.2005 | Nidwalden | 510                               | Deposition           | L                            | 24.2                              | 35.3               | 15.2                        | 4.4                            | 28.0                | 80                                 | 100               |                                 | 60'000                          | 0.41             |                            |                            |
| Sädelgrabe            | 24.07.2014 | Berne     | 490                               | Deposition           | L, B, D                      | 1.3                               | 2.0                | 2.0                         | 0.3                            | 23.9                | 30                                 | 300               |                                 | 17'000                          | 0.97             | 7                          | 96                         |

|                     |            |           |     |             |         |      |       |       |      |      |     |       |           |         |      |     |     |
|---------------------|------------|-----------|-----|-------------|---------|------|-------|-------|------|------|-----|-------|-----------|---------|------|-----|-----|
| Steinibach (Giswil) | 09.06.1996 | Obwalden  | 450 | Deposition  | I, D, B | 12.0 | 10    | 8.0   | 5.4  | 24.5 | 50  | > 100 | 45'000    | 200'000 | 0.41 | 2   |     |
| Rütigrabe           | 22.08.2005 | Berne     | 339 | Recruitment | D       | 1.8  | 2.574 | 1.7   | 0.4  | 27.8 |     |       |           |         | 1.14 |     |     |
| Maienbach           | 15.08.1997 | Obwalden  | 300 | Deposition  | D       | 4.9  | 8.5   | 7.1   | 1.5  | 36.6 | 35  | <100  |           | 13'500  | 0.74 | 2.5 | 120 |
| Isentalerbach       | 22.08.2005 | Uri       | 300 | Deposition  | D       | 59.7 | 63.3  | 29.8  | 12.7 | 44.6 |     |       | 6'247'710 | 10'000  | 0.32 |     | 106 |
| Haldibach           | 22.08.2005 | Nidwalden | 300 | Deposition  | D, L    | 2.9  | 4.1   | 2.7   | 1.0  | 18.2 |     |       | 309'636   | 250'000 | 0.82 | 48  | 163 |
| Gärtelbach          | 24.07.2014 | Berne     | 260 | Deposition  | D, B    | 0.8  | 1.7   | 1.7   | 0.2  | 24.2 | 18  | 300   |           | 8'000   | 1.18 | 7   | 96  |
| Goldach             | 01.06.2009 | Thurgau   | 240 | Deposition  |         | 50.4 | 140.9 | 125.5 | 15.9 | 49.2 |     |       |           |         | 0.12 |     |     |
| Varuna              | 18.07.1987 | Grisons   | 180 | Recruitment | B, L    | 4.0  | 5.1   | 1.7   | 1.2  | 8.8  | 2   |       | 64'800    | 200'000 | 1.20 |     |     |
| Pletschenbächli     | 22.08.2005 | Berne     | 174 | Recruitment | D       | 2.2  | 5.001 | 1.9   | 0.3  | 18.3 |     |       |           |         | 0.85 |     |     |
| Gruonbach           | 22.08.2005 | Uri       | 165 | Recruitment | L, D    | 8.3  | 16.4  | 14.7  | 4.1  | 16.9 |     |       | 773'867   | 40'000  | 0.62 |     | 115 |
| Schwendibach        | 24.08.2005 | Berne     | 150 | Deposition  | D       | 11.1 | 25.3  | 8.1   | 2.0  | 9.1  | 60  |       |           | 11'000  | 0.55 | 65  | 275 |
| Goneri (Gerewasser) | 24.09.1993 | Valais    | 145 | Recruitment | I       | 40.0 | 61.9  | 7.0   | 1.6  | 16.8 |     |       |           |         | 0.29 |     |     |
| Bärselbach          | 24.07.2014 | Berne     | 141 | Recruitment | B, L    | 13.1 | 7.0   | 6.3   | 3.5  | 17.0 | 108 |       |           |         | 0.31 |     | 92  |
| Saxetebach          | 03.07.1987 | Berne     | 135 | Deposition  | B       | 20.0 | 8.3   | 4.6   | 7.0  | 36.8 |     |       |           |         | 0.49 |     |     |
| Sundgraben          | 02.01.2012 | Berne     | 45  | Deposition  | L, (D)  | 9.7  | 23.4  | 22.2  | 5.1  | 22.5 | 250 | 30    |           | 40'000  | 0.48 | 115 | 61  |

**Table S2: Mean channel width extrapolation of the ecomorphological dataset based on stream order (FLOZ) and altitude classes.**

|              |        | Altitude [m a.s.l.]      |                          |                          |                          |                          |                          |                          |                          |
|--------------|--------|--------------------------|--------------------------|--------------------------|--------------------------|--------------------------|--------------------------|--------------------------|--------------------------|
|              |        | <600                     |                          | 600-1200                 |                          | 1200-1800                |                          | >1800                    |                          |
|              |        | Average stream width [m] | Total stream length [km] | Average stream width [m] | Total stream length [km] | Average stream width [m] | Total stream length [km] | Average stream width [m] | Total stream length [km] |
| Stream order | FLOZ 1 | 1.2                      | 2641                     | 1.3                      | 3973                     | 2.3                      | 1163                     | 5.1                      | 431                      |
|              | FLOZ 2 | 1.8                      | 2100                     | 2.1                      | 2493                     | 3.9                      | 872                      | 8.2                      | 278                      |
|              | FLOZ 3 | 3.2                      | 1811                     | 4.2                      | 1575                     | 7.3                      | 590                      | 11.0                     | 259                      |
|              | FLOZ 4 | 5.1                      | 1229                     | 9.3                      | 1107                     | 15.9                     | 578                      | 17.2                     | 182                      |
|              | FLOZ 5 | 13.1                     | 694                      | 17.3                     | 901                      | 22.6                     | 301                      |                          |                          |
|              | FLOZ 6 | 17.4                     | 563                      | 27.3                     | 404                      | 24.2                     | 20                       |                          |                          |
|              | FLOZ 7 | 29.4                     | 500                      | 42.0                     | 80                       |                          |                          |                          |                          |
|              | FLOZ 8 | 70.9                     | 341                      |                          |                          |                          |                          |                          |                          |
|              | FLOZ 9 | 82.7                     | 247                      |                          |                          |                          |                          |                          |                          |

**Table S3: Kolmogorov-Smirnov Test: Differences in distributions of observed versus estimated wood supply volumes (large scenario).**

|             | D-value | p-value   |
|-------------|---------|-----------|
| FGA vs. Obs | 0.4     | 0.003323* |
| EGA vs. Obs | 0.275   | 0.0971    |
| FGA vs. EGA | 0.15    | 0.7659    |

\* statistically different

## Supplementary Figures

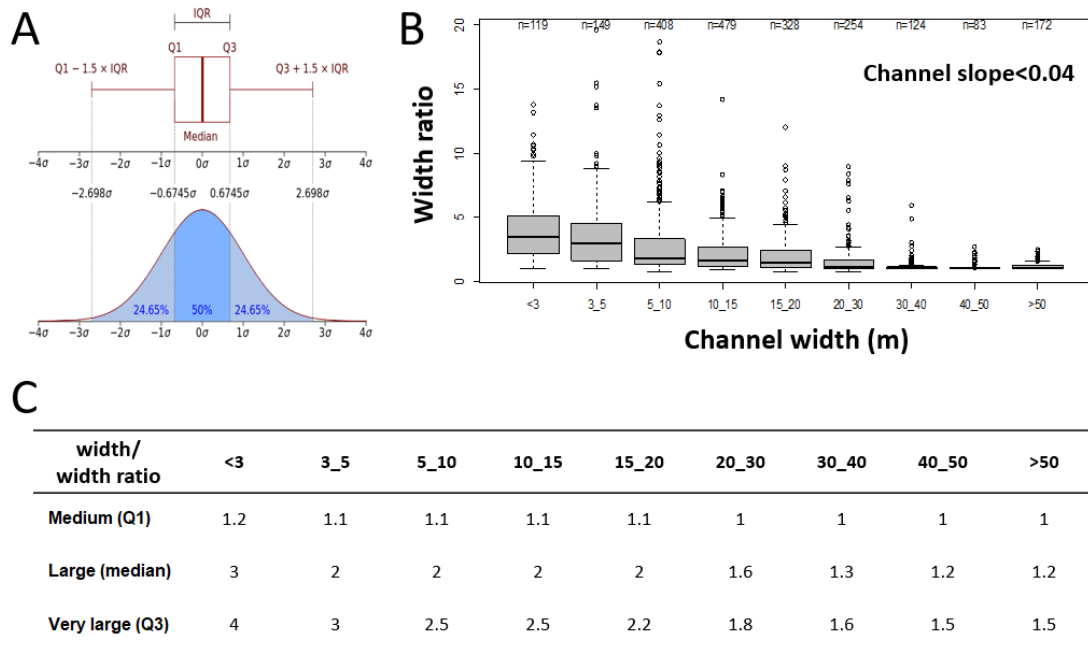

**Figure S1: (A) Boxplot and density function showing the quartiles used to define the FGA scenarios; (B) boxplots of width ratio values for different channel width classes for rivers with longitudinal slopes lower than 4 %; (C) table showing the final values of width ratio used for the three scenarios and the different width classes.**

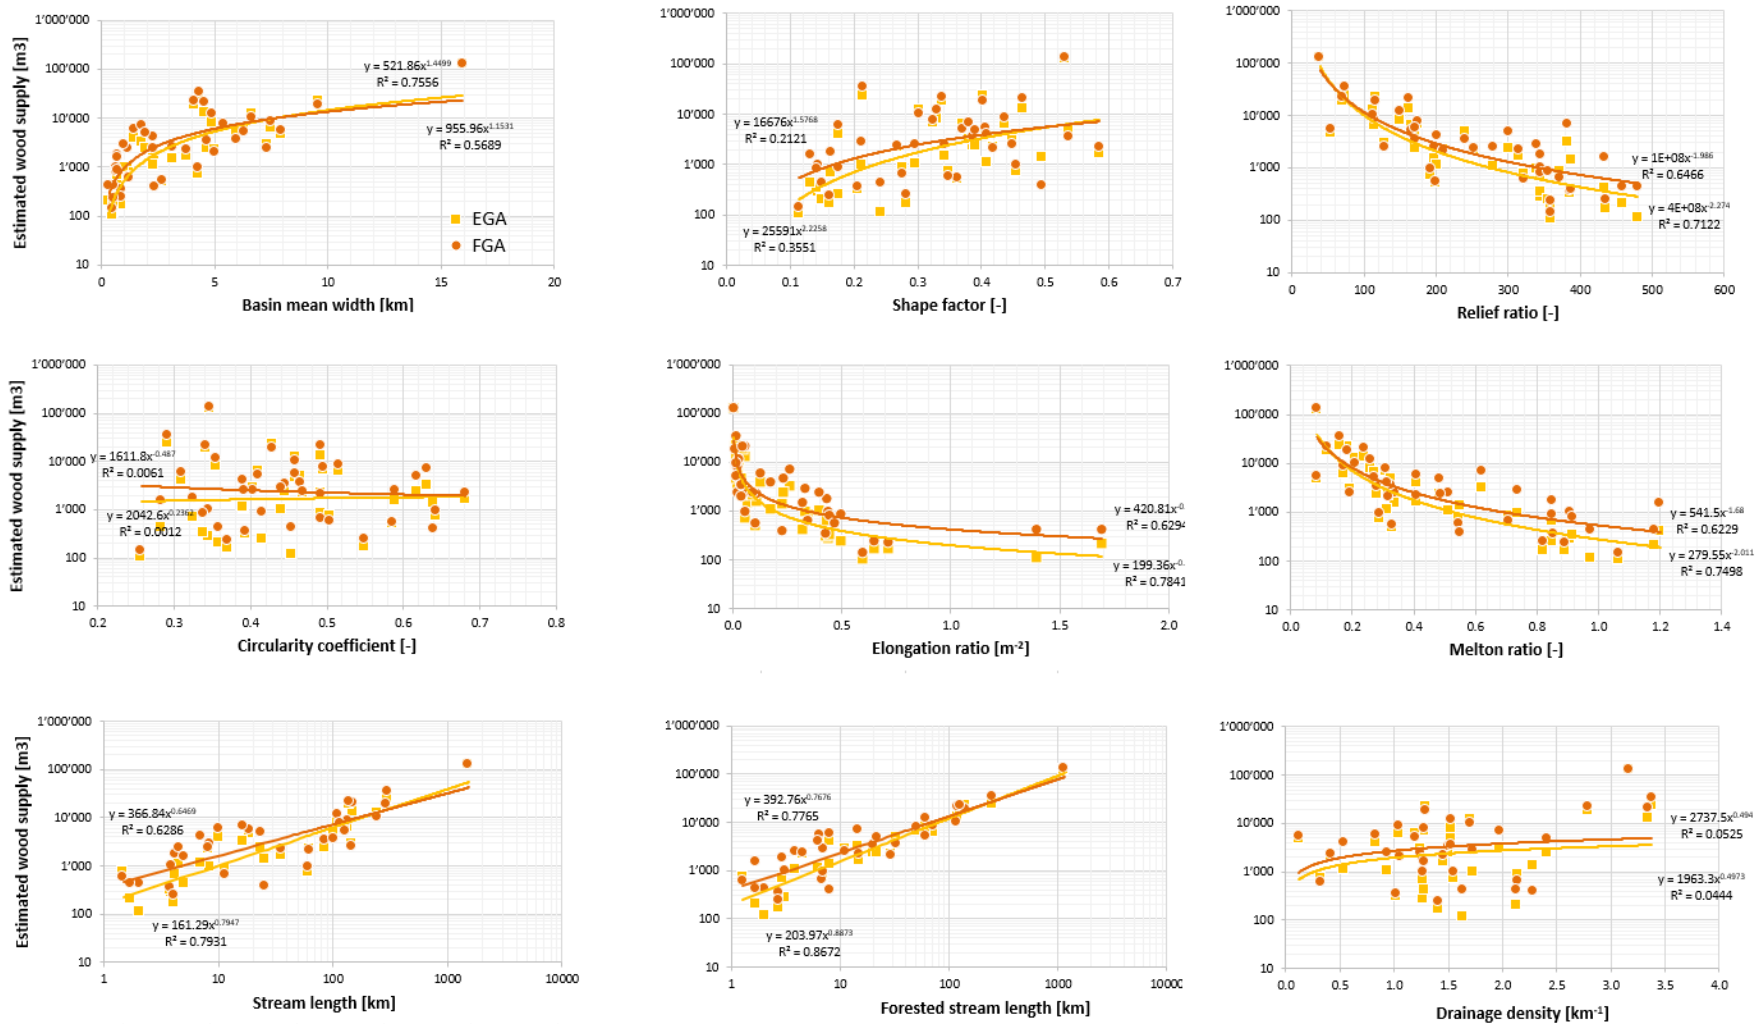

1  
2  
3

Figure S2: Wood volume estimated (large scenario) by the two models and different catchment characteristics: basin mean width, shape factor, relief ratio, circularity coefficient, elongation ratio, Melton ratio, stream length, forested stream length, drainage density.



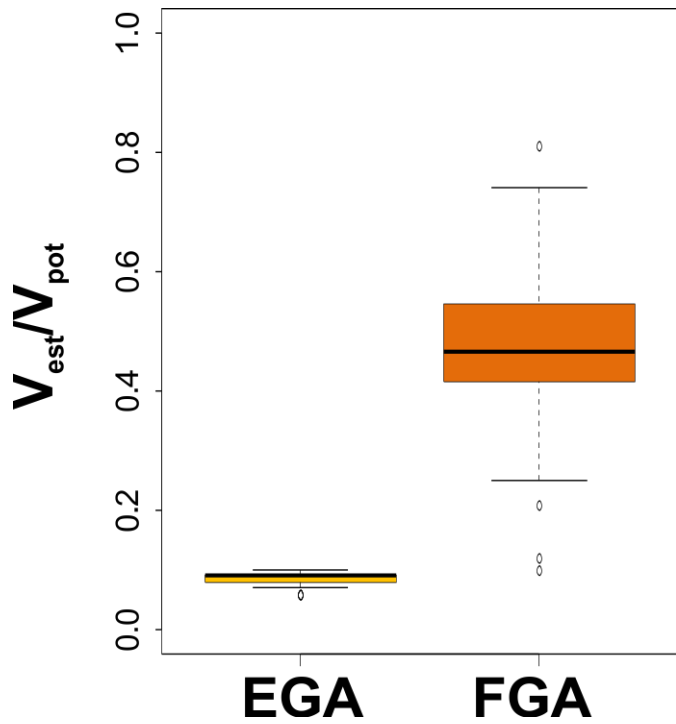

4  
5  
6  
7  
8

Figure S3: Boxplots for the ratio of estimated and potential wood supply volumes (large scenario) calculated for EGA (yellow) and FGA (orange) for all sites.

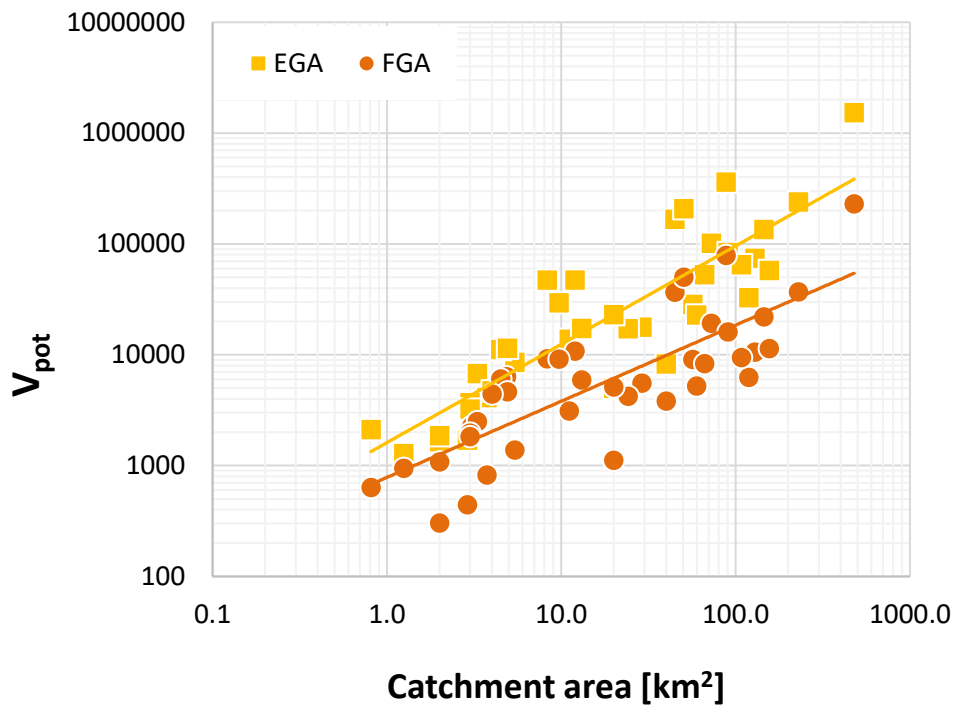

9  
10  
11  
12

Figure S4: Scatter plot showing potential LW supply volume (large scenario) by the two models in relation to the respective catchment area.

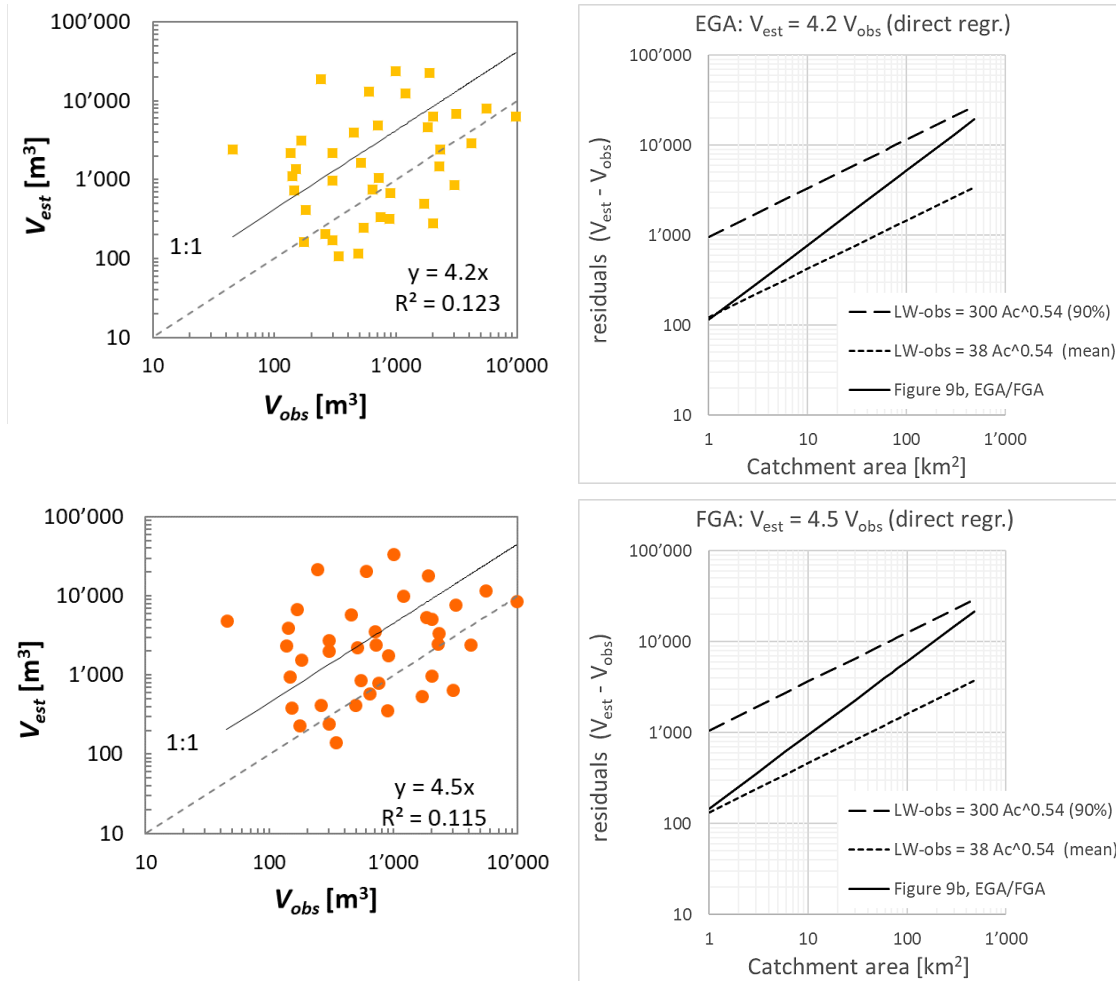

13 Figure S5: Top row left: Linear regression of  $V_{est}$  and  $V_{obs}$  for EGA. Top row right: Residuals ( $V_{est} - V_{obs}$ ) for  
 14 EGA in comparison with empirical LW estimation formulas (50 and 90% percentile) depending on catchment  
 15 area. Bottom row left: Linear regression of  $V_{est}$  and  $V_{obs}$  for FGA. Bottom row right: Residuals ( $V_{est} - V_{obs}$ ) for  
 16 FGA in comparison with empirical LW estimation formulas (50 and 90% percentile) depending on catchment  
 17 area.

18

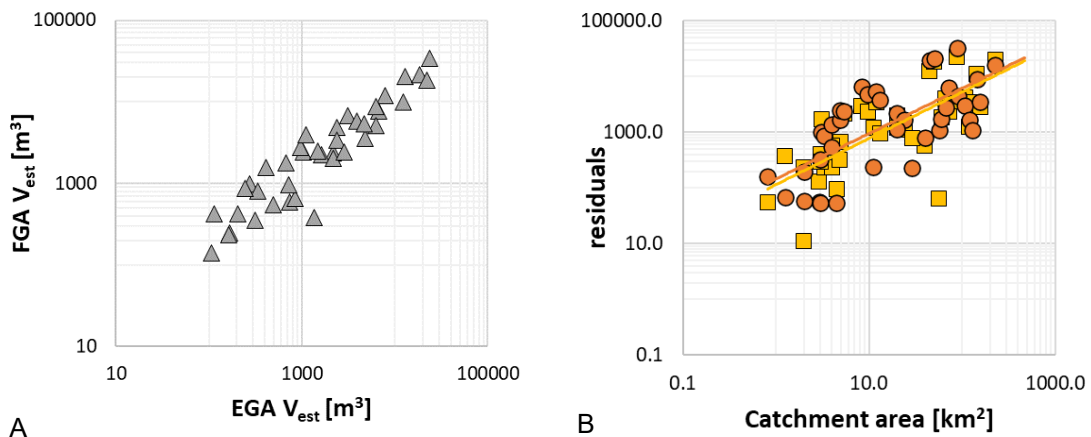

19 Figure S6: (A) Scatter plot of estimated wood supply volumes (EGA vs. FGA; large scenario); (B) large scenario  
 20 residuals of EGA (yellow) and FGA (orange) versus catchment area.

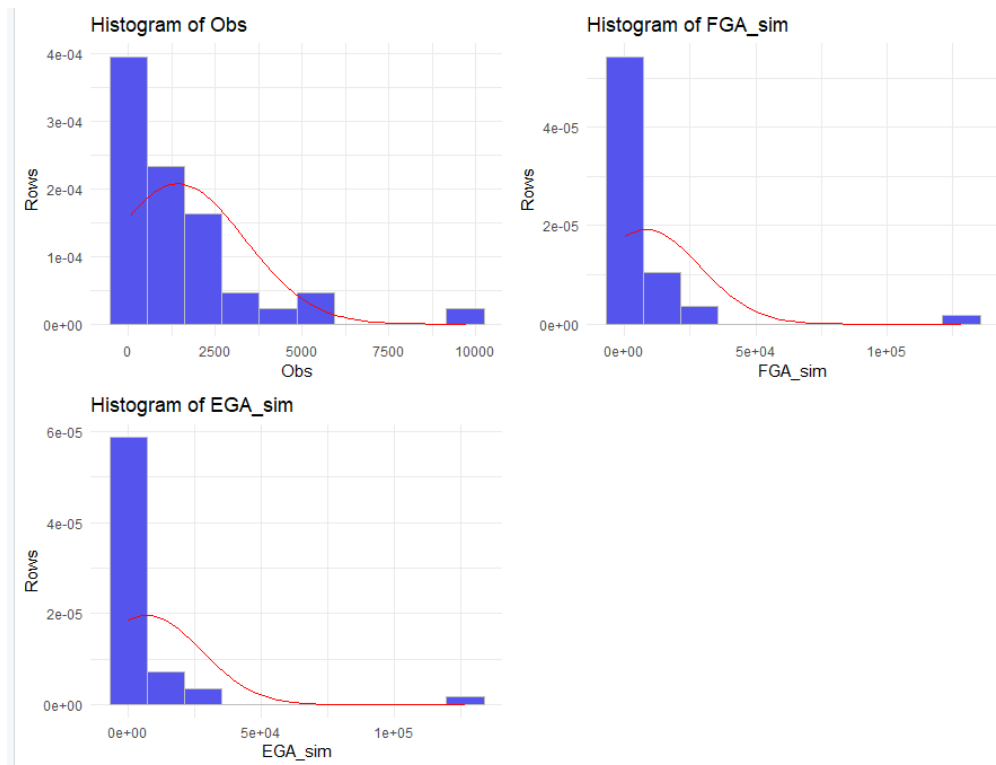

A

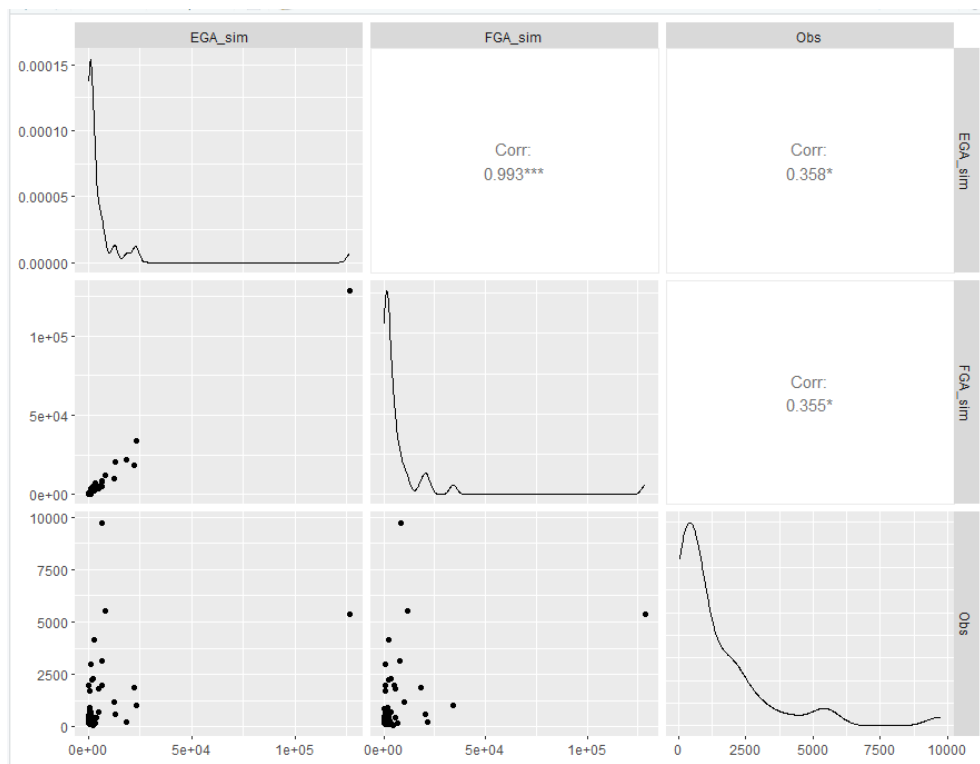

B

21 Figure S7: (A) Histogram of observed LW volumes in comparison of EGA and FGA results (large scenario); (B)  
 22 scatter plots and correlation coefficients for observed LW volumes, EGA and FGA results (large scenario).

23
